# Supplementary material for: Photo-induced charge boosting of liquid–solid electrokinetic generators for efficient wave energy harvesting
Source: Royal Society of Chemistry journal article supplement (doi:10.1039/c8ta12037d), 2019-01-01
Supplement: c8ta12037d1.pdf [file c8ta12037d1.pdf]

## Supplementary Information

### **Photo-Induced Charge Boosting of Liquid-Solid Electrokinetic Generators for Efficient Wave Energy Harvesting**

*Jin Tan, ‡ Yuanyuan Zhao, ‡ Xiya Yang, \* Jialong Duan, Yudi Wang, Qunwei Tang\**

**Table S1.** Electrical data produced by waving seawater onto *L*-SEKGs with different film content at seawater temperature of 25 °C and wave frequency of 0.9 Hz.

| <b>Film composition</b>  | <b>Variable</b>                                                 | <b>Values</b>      | <b>Voltage (mV)</b> | <b>Current (<math>\mu</math>A)</b> | <b>Power (<math>\mu</math>W)</b> |
|--------------------------|-----------------------------------------------------------------|--------------------|---------------------|------------------------------------|----------------------------------|
| <b>GO-CB</b>             | <b>GO-CB ratio</b>                                              | 0/1                | 49.56 $\pm$ 5.51    | 0.57 $\pm$ 0.05                    | 0.03 $\pm$ 0.01                  |
|                          |                                                                 | 1/6                | 68.70 $\pm$ 11.51   | 7.35 $\pm$ 0.81                    | 0.50 $\pm$ 0.15                  |
|                          |                                                                 | 2/5                | 76.63 $\pm$ 7.36    | 35.93 $\pm$ 8.04                   | 2.75 $\pm$ 0.94                  |
|                          |                                                                 | 3/4                | 78.82 $\pm$ 12.43   | 9.10 $\pm$ 0.71                    | 0.72 $\pm$ 0.18                  |
|                          |                                                                 | 4/3                | 62.33 $\pm$ 6.19    | 4.25 $\pm$ 0.61                    | 0.26 $\pm$ 0.07                  |
|                          |                                                                 | 5/2                | 38.33 $\pm$ 3.33    | 0.57 $\pm$ 0.17                    | 0.02 $\pm$ 0.01                  |
| <b>GO-CB</b>             | <b>GO reduction time</b>                                        | 0                  | 75.20 $\pm$ 5.89    | 7.33 $\pm$ 1.25                    | 0.55 $\pm$ 0.14                  |
|                          |                                                                 | 3                  | 72.73 $\pm$ 6.88    | 9.05 $\pm$ 1.02                    | 0.66 $\pm$ 0.14                  |
|                          |                                                                 | 5                  | 71.11 $\pm$ 15.14   | 18.90 $\pm$ 4.28                   | 1.34 $\pm$ 0.65                  |
|                          |                                                                 | 10                 | 58.46 $\pm$ 8.15    | 1.74 $\pm$ 0.16                    | 0.1 $\pm$ 0.02                   |
| <b>GO-CB-MWCNT</b>       | <b>MWCNT dosage</b>                                             | 0 wt%              | 78.82 $\pm$ 12.43   | 9.10 $\pm$ 0.71                    | 0.72 $\pm$ 0.18                  |
|                          |                                                                 | 5 wt%              | 104.07 $\pm$ 17.06  | 14.45 $\pm$ 1.91                   | 1.50 $\pm$ 0.48                  |
|                          |                                                                 | 10 wt%             | 89.62 $\pm$ 11.78   | 77.51 $\pm$ 16.43                  | 6.95 $\pm$ 2.65                  |
|                          |                                                                 | 17 wt%             | 81.12 $\pm$ 17.48   | 111.72 $\pm$ 16.68                 | 9.06 $\pm$ 3.59                  |
|                          |                                                                 | 25 wt%             | 64.10 $\pm$ 11.41   | 98.55 $\pm$ 16.85                  | 6.32 $\pm$ 1.64                  |
| <b>GO-CB-MWCNT/C QDs</b> | <b>CQD dosage In the dark</b>                                   | 0 mL               | 77.72 $\pm$ 9.26    | 134.29 $\pm$ 9.66                  | 10.44 $\pm$ 2.08                 |
|                          |                                                                 | 10 mL              | 79.75 $\pm$ 9.89    | 144.94 $\pm$ 6.27                  | 11.56 $\pm$ 1.99                 |
|                          |                                                                 | 20 mL              | 79.27 $\pm$ 5.20    | 135.56 $\pm$ 11.18                 | 10.75 $\pm$ 1.65                 |
|                          |                                                                 | 30 mL              | 71.54 $\pm$ 8.32    | 132.01 $\pm$ 8.42                  | 9.43 $\pm$ 1.78                  |
|                          | <b>CQD dosage Illumination (AM 1.5, 100 mWncm<sup>-2</sup>)</b> | 0 mL               | 78.72 $\pm$ 15.08   | 113.62 $\pm$ 10.09                 | 8.94 $\pm$ 2.66                  |
|                          |                                                                 | 10 mL              | 95.22 $\pm$ 17.62   | 292.75 $\pm$ 63.85                 | 27.88 $\pm$ 12.37                |
|                          |                                                                 | 20 mL              | 101.26 $\pm$ 6.63   | 394.70 $\pm$ 39.40                 | 39.97 $\pm$ 6.87                 |
| 30 mL                    | 91.42 $\pm$ 11.29                                               | 275.62 $\pm$ 64.02 | 25.20 $\pm$ 9.68    |                                    |                                  |

**Table S2.** Influences of wave frequency, seawater temperature and illumination intensity on the output performance of optimum *L*-SEKGs with GO/CB ratio of 3/4, GO reduction time of 5min, MWCNT dosage of 17 wt% and CQDs dosage of 20mL.

| <b>Film content</b>     | <b>Test parameters</b>                                         |                   | <b>Voltage (mV)</b> | <b>Current (<math>\mu</math>A)</b> | <b>Power (<math>\mu</math>W)</b> |
|-------------------------|----------------------------------------------------------------|-------------------|---------------------|------------------------------------|----------------------------------|
| <b>GO-CB-MWCNT</b>      | <b>Wave frequency (Hz)</b>                                     | 0.17              | 115.24 $\pm$ 15.46  | 160.22 $\pm$ 8.6                   | 18.46 $\pm$ 3.60                 |
|                         |                                                                | 0.3               | 96.09 $\pm$ 11.65   | 155.71 $\pm$ 9.06                  | 14.96 $\pm$ 2.79                 |
|                         |                                                                | 0.9               | 78.31 $\pm$ 13.67   | 109.13 $\pm$ 11.67                 | 8.55 $\pm$ 2.56                  |
|                         | <b>Seawater temperature (<math>^{\circ}</math>C)</b>           | 0                 | 96.76 $\pm$ 3.40    | 175.36 $\pm$ 3.8                   | 16.97 $\pm$ 0.97                 |
|                         |                                                                | 10                | 89.51 $\pm$ 5.67    | 149.73 $\pm$ 6.5                   | 13.40 $\pm$ 1.47                 |
|                         |                                                                | 20                | 78.03 $\pm$ 7.09    | 143.10 $\pm$ 5.40                  | 11.17 $\pm$ 1.47                 |
| 30                      |                                                                | 69.36 $\pm$ 11.23 | 127.27 $\pm$ 7.06   | 8.83 $\pm$ 2.00                    |                                  |
| 40                      |                                                                | 46.11 $\pm$ 4.06  | 113.62 $\pm$ 11.60  | 5.24 $\pm$ 1.04                    |                                  |
| <b>GO-CB-MWCNT/CQDs</b> | <b>Illumination intensity (<math>\text{mW cm}^{-2}</math>)</b> | 0                 | 80.35 $\pm$ 9.77    | 116.98 $\pm$ 11.45                 | 9.40 $\pm$ 2.17                  |
|                         |                                                                | 40                | 83.83 $\pm$ 8.54    | 197.07 $\pm$ 14.67                 | 16.52 $\pm$ 3.04                 |
|                         |                                                                | 70                | 88.74 $\pm$ 6.63    | 231.67 $\pm$ 24.23                 | 20.56 $\pm$ 3.84                 |
|                         |                                                                | 100               | 101.26 $\pm$ 6.63   | 394.70 $\pm$ 39.40                 | 39.97 $\pm$ 6.87                 |

## Raman spectra characterization

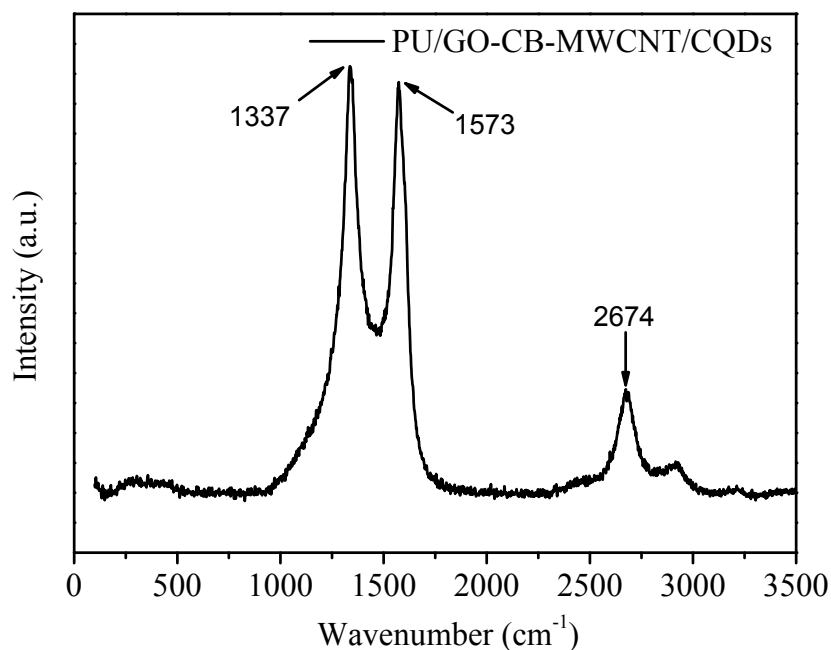

**Figure S1.** Raman spectra of PU/GO-CB-MWCNT/CQDs composite film using 532 nm wavelength laser.

For pristine PU/GO-CB-MWCNT/CQDs composite film, the D, G, and 2D peaks are detected at 1337, 1573, and 2674 cm<sup>-1</sup>, respectively. There are no peak deviations compared to the typical Raman spectrum of graphene oxide and multiwalled carbon nanotubes, indicating the existing of graphene and multiwalled carbon nanotubes in the PU/GO-CB-MWCNT/CQDs composite film. The high intensity ratio of the D peak to the G peak ( $I_D/I_G$ ) of 1.04 shows the presence of defects and oxygen-containing functional groups in GO and multiwalled carbon nanotubes.

## X-ray photoelectron spectroscopy (XPS) characterization

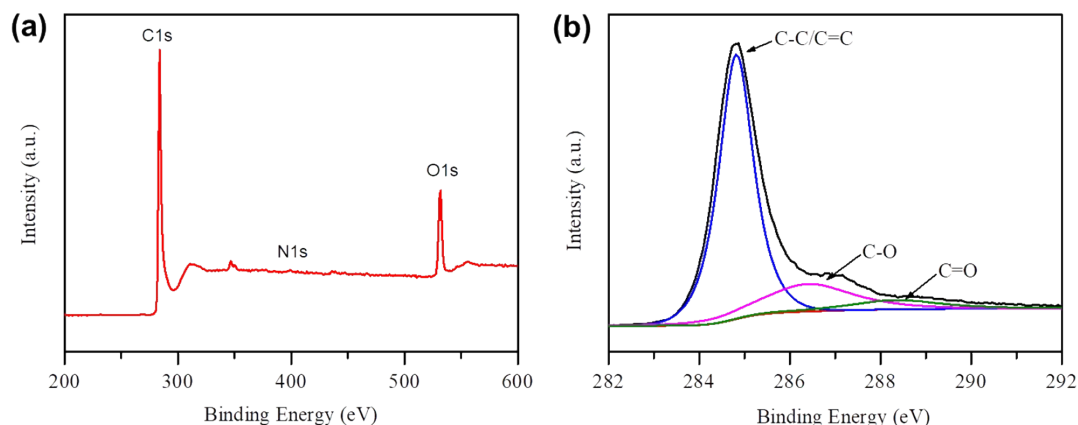

**Figure S2.** Survey scan (a) and C 1s (b) XPS spectra of the PU/GO-CB-MWCNT/CQDs composite film.

X-ray photoelectron spectroscopy (XPS) measurements were also performed on the PU/GO-CB-MWCNT/CQDs composite film after grinding. Three kind of elements of C, N and O are detected to exist as well as C derives from carbon nanomaterials in the film including graphene oxid, multiwalled carbon nanotubes, carbon black and carbon quantum dots, O and N mainly comes from the funtional groups linked to graphene oxid and multiwalled carbon nanotubes. The C1s XPS spectrum of PU/GO-CB-MWCNT/CQDs composite film clearly shows considerable carbon content (C-C/C=C, 284.6 eV) and oxygen content with two components that correspond to carbon atoms in different functional groups: the carbon in C-O bonds (hydroxyl and epoxy, 286.4 eV), and the carbonyl carbon (C=O, 288.5 eV). The results prove the massive content of carbon materials and the presence of oxygen-containing fountional groups in the film.

---

There are no signal generation by waving deionized water onto *L*-SEKG based on GO-CB composite film as shown in Figure S1.

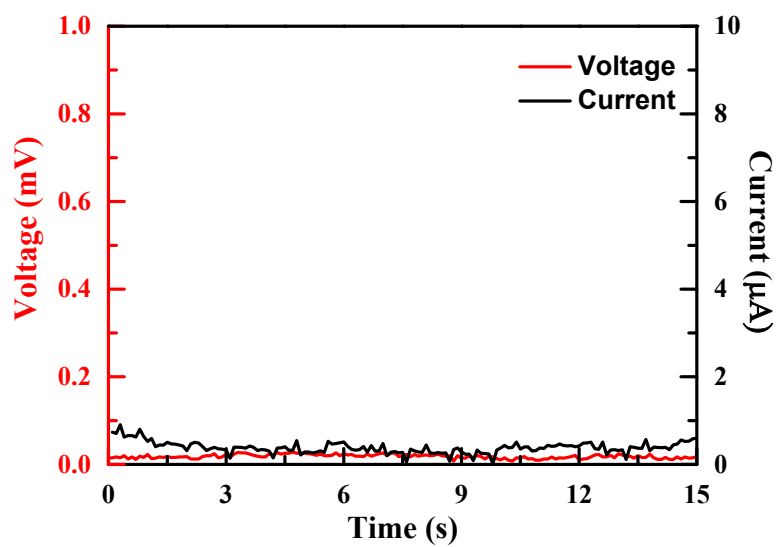

**Figure S3.** Voltage and current signals yielded by waving room-temperature deionized water onto PU/GO-CB/Cu *L*-SEKG at a frequency of 0.9 Hz.

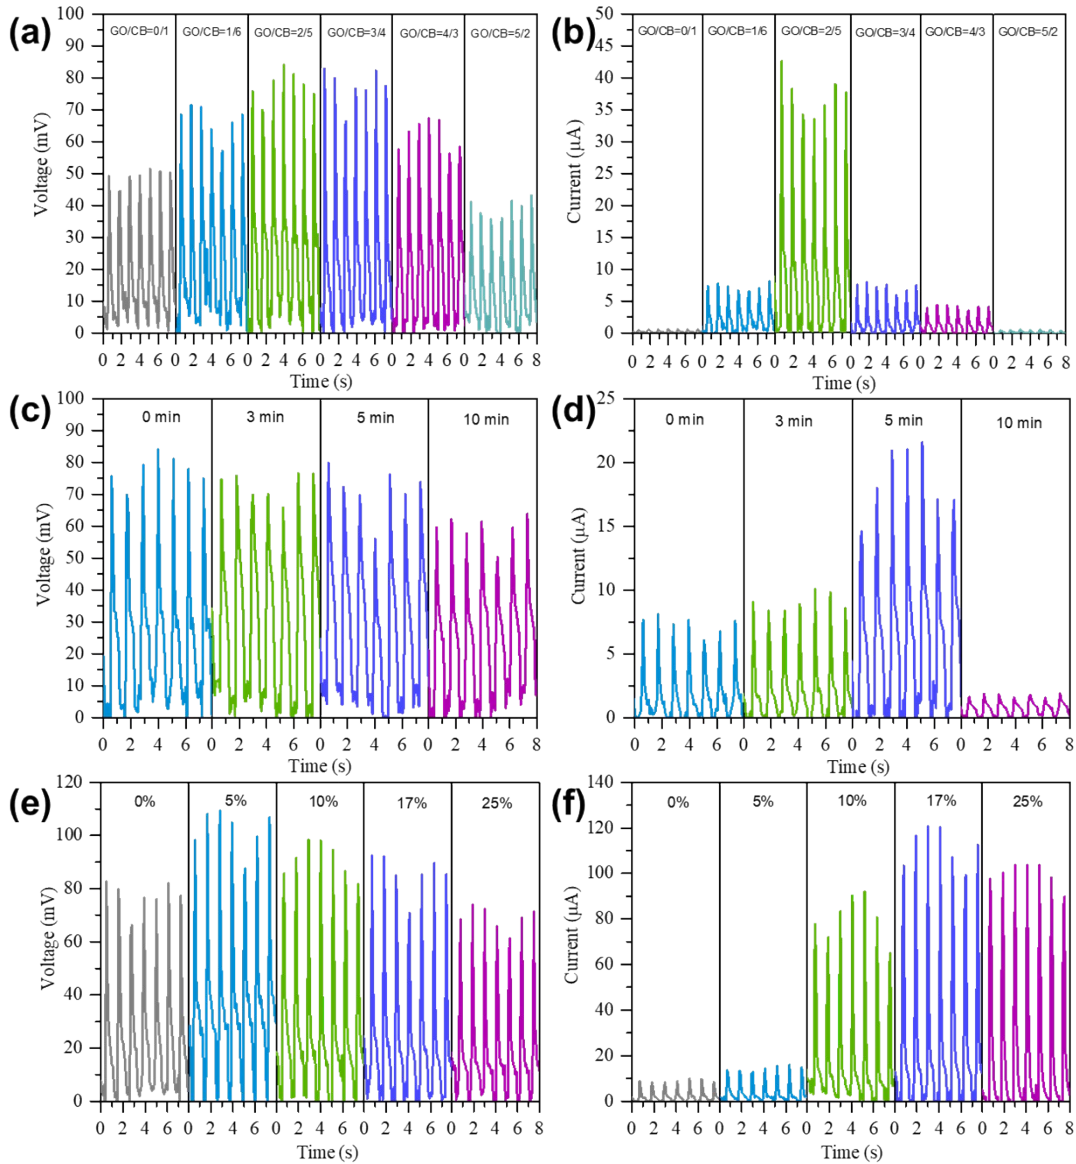

**Figure S4.** Periodic voltage and current output signals of GO-CB composite film based L-SEKG impacted by various (a, b) GO/CB ratio and (c, d) Reduction time of GO at wave frequency of 0.9Hz at 25°C. (e, f) Voltage and current output signals of GO-CB-MWCNT composite film based L-SEKG with different MWCNT dosage at 25°C and frequency of 0.9Hz.

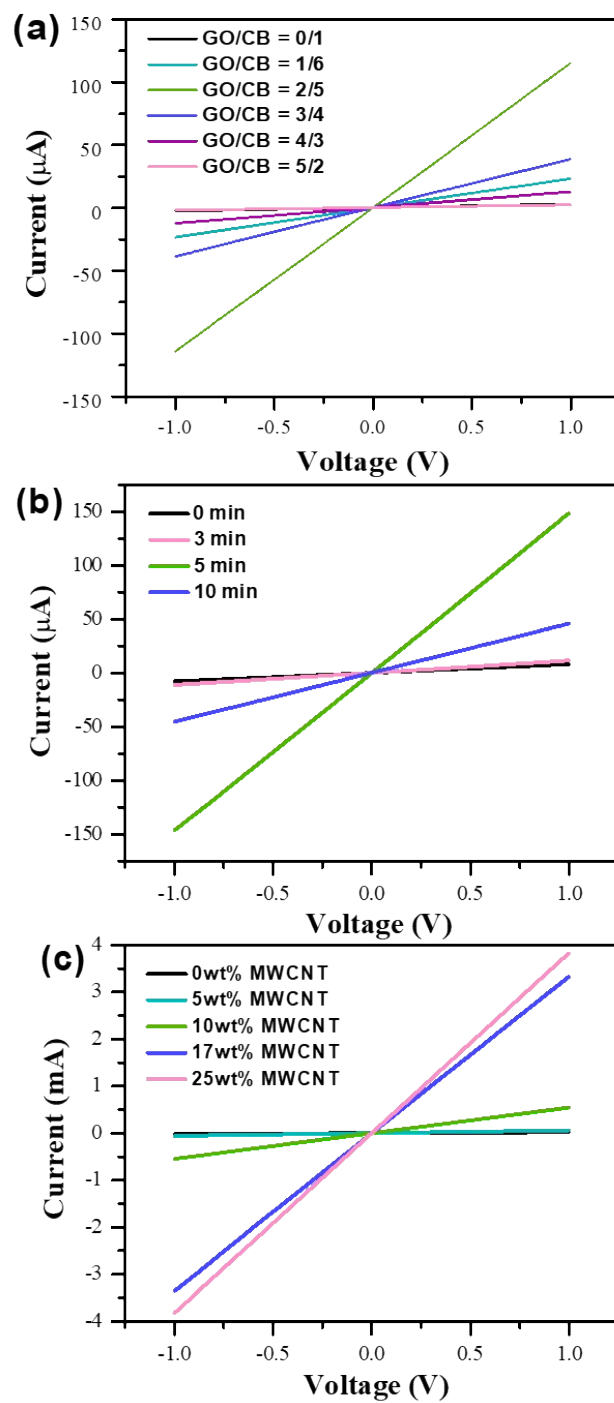

**Figure S5.** The Ohmic resistances recorded on GO-CB composite films with (a) Different GO/CB ratio and (b) Various GO reduction time. (c) The ohmic resistances recorded on GO-CB-MWCNT with different MWCNT dosages.



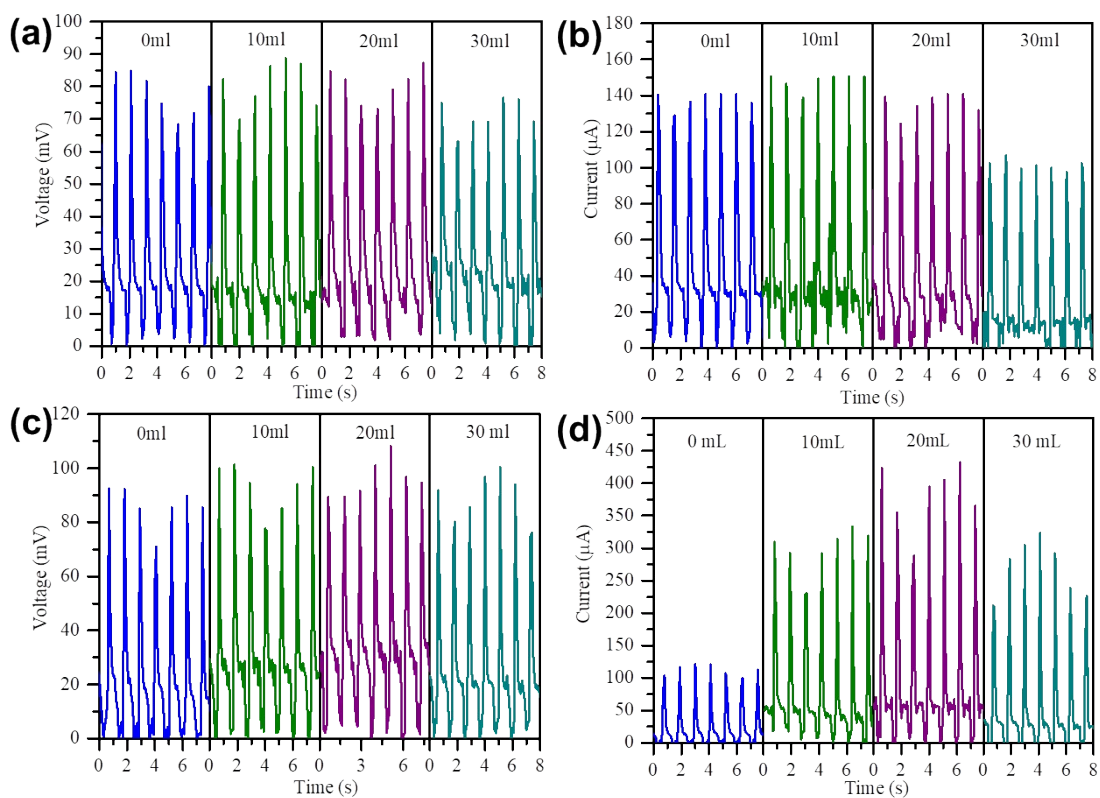

**Figure S6.** The voltage and current signals by waving room-temperature seawater onto PU/GO-CB-MWCNT/GQDs/Cu *L*-SEKs with various CQDs dosage at wave frequency of 0.9 Hz under (a, b) Dark condition and (c, d) Illumination intensity of 100 mW cm<sup>-2</sup>.

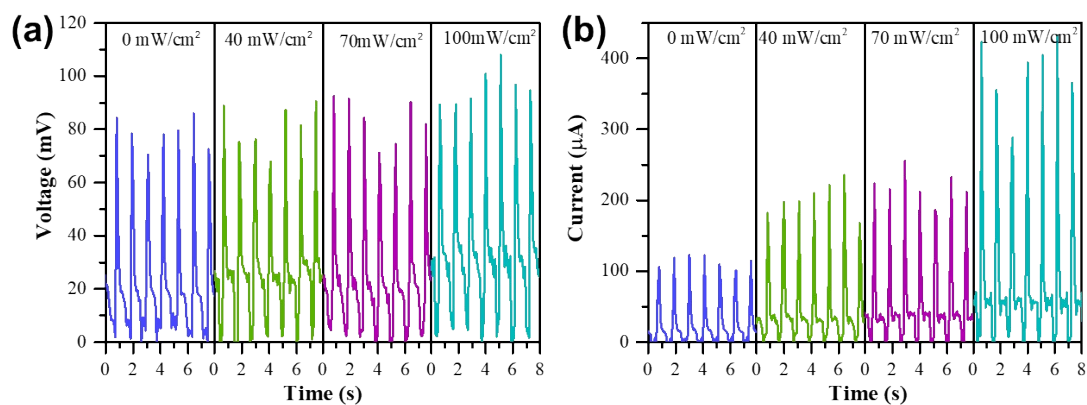

**Figure S7.** The (a) voltage and (b) current signals by waving room-temperature seawater onto PU/GO-CB-MWCNT/CQDs/Cu L-SEKs with illumination intensity increased from 0 to 100 mW cm<sup>-2</sup> with CQD dosage of 20mL at wave frequency of 0.9 Hz.
